# Supplementary material
Source: HighWire-hosted journal article supplement (https://jnm.snmjournals.org/highwire/filestream/95012/field_highwire_adjunct_files/0/174565_Supplemental_Data.pdf)

**Supplemental Table 1.** PET system specifications

| PET System                                | Detector crystal material | Reconstruction algorithm | Filter type | Cutoff (mm) | PGC |
|-------------------------------------------|---------------------------|--------------------------|-------------|-------------|-----|
| Biograph mCT PET-CT-40 <sup>‡</sup>       | LSO                       | 3D OSEM-PSF              | Gaussian    | 8           | Yes |
| Biograph TruePoint PET-CT-16 <sup>‡</sup> | LSO                       | 3D OSEM-PSF              | Gaussian    | 8           | Yes |
| Biograph PET-CT-16                        | LSO                       | 3D OSEM                  | Gaussian    | 12          | Yes |
| ECAT Accel Scintron PET <sup>‡</sup>      | LSO                       | 2D OSEM<br>3D OSEM       | Hann        | 8           | Yes |
| Discovery 690 PET-VCT-64                  | LBS                       | 3D OSEM                  | Hann        | 8           | Yes |
| Discovery IQ (5 ring) PET-CT-16*          | BGO                       | 3D OSEM                  | Hann        | 8           | Yes |
| Discovery 600 PET-CT-16                   | BGO                       | 3D OSEM                  | Hann        | 8           | Yes |
| Discovery RX PET-CT-16                    | LYSO                      | 3D FORE-FBP              | Hann        | 12          | No  |
| Discovery STE-VCT-16                      | BGO                       | 3D FORE-FBP              | Hann        | 12          | No  |
| Gemini TF PET-CT-16                       | LGSO                      | 3D RAMLA                 | Normal      | NA          | No  |

LSO = lutetium oxyorthosilicate; LBS = lutetium-based scintillator; BGO = bismuth germanium oxide; LYSO = lutetium yttrium oxyorthosilicate; LGSO = lutetium gadolinium oxyorthosilicate; FORE = Fourier rebinning; FBP = filtered back projection; IR = iterative reconstruction; RAMLA = row-action maximum likelihood algorithm; OSEM = ordered subset expectation maximization; PSF = point spread function; NA = not applicable; PGC = prompt-gamma correction. <sup>‡</sup> Rb-82 was infused using the CardioGen-82® elution system on these cameras (50 mL/min 'bolus'), whereas the RUBY-FILL® elution system (30s 'square-wave' with saline push) was used on the others. \* N-13-ammonia was used on this camera; Rb-82 was used on all others.

**Supplemental Table 2.** Patient demographics

| PET System    | Patient Weight (kg)     | Patient Age (years) | Patient Sex (male) |
|---------------|-------------------------|---------------------|--------------------|
| Discovery 690 | 90.0 ± 12.1             | 57.3 ± 11.5         | 8                  |
| Discovery 600 | 74.6 ± 9.0 <sup>‡</sup> | 70.8 ± 7.9          | 11                 |
| Scintron 3D   | 82.7 ± 16.7*            | 74.9 ± 10.3*        | 12                 |

<sup>‡</sup>: p < 0.05 compared to Discovery 690 population

\*: p < 0.05 compared to Discovery 690 and 600 populations

**Supplemental Figure 1.** Patients underwent low-dose (10 MBq/kg) rest Rb-82 PET MBF imaging after fasting for 4 hours and abstaining from caffeine and theophylline-containing medications for 12 hours prior to the test. Anti-anginal medications ( $\beta$ -blockers, calcium antagonists, and nitrates) were withheld on the morning of the study. Illustrated here are the rest and stress MBF imaging protocol timelines for patient studies performed on **(A)** the Discovery 690 and 600 PET-CT systems and **(B)** the Scintron PET-only system. The CTAC images were fast (<2s) helical, low-dose (<0.4 mSv) scans obtained at normal end-expiration. PET-CTAC alignment was verified and corrected, if necessary, prior to image reconstruction using the vendor attenuation correction quality control (ACQC) program. From the list-mode data, static and dynamic images were reconstructed using manufacturer-provided iterative algorithms with all corrections enabled and 8mm Hann post-filtering. Static tracer uptake images were reconstructed using 2-6 min list-mode data. Dynamic images were reconstructed into 14 time frames (9 x 10s, 3 x 30s, 1 x 60s, 1 x 120s) on the Discovery 690 and 600 cameras, and 25 time frames (12 x 5s, 6 x 10s, 3 x 20s, 3 x 30s, 1 x 90s) on the Scintron scanner, according to local clinical practice.

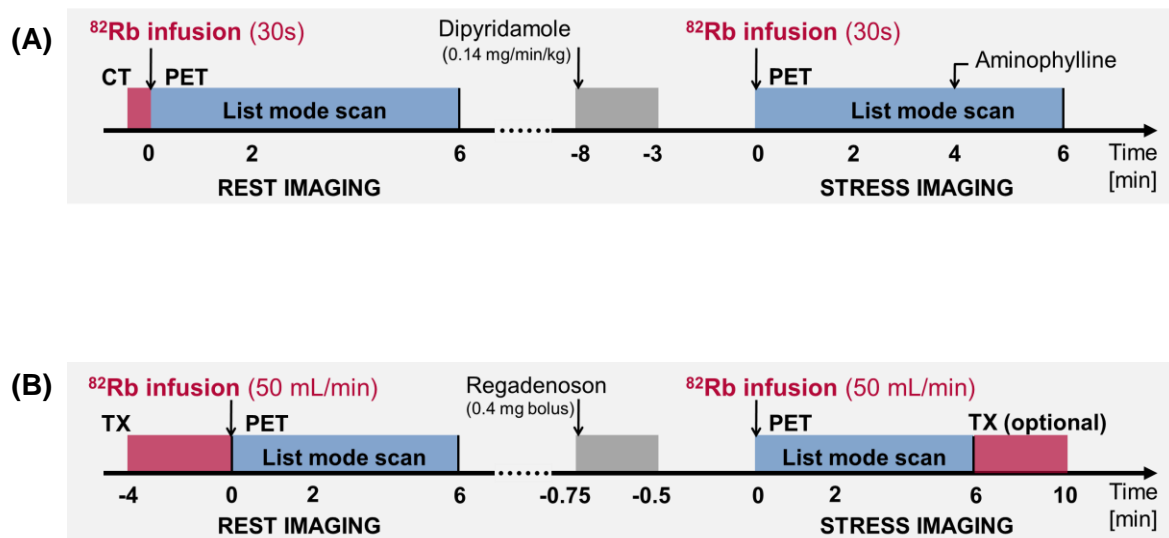

Supplement: 174565_Supplemental_Data.pdf [file 174565_Supplemental_Data.pdf]
